# Supplementary material
Source: Elsevier journal article supplement (https://www.sciencedirect.com/science/article/pii/S2530064422000542)
Supplement: mmc1 [file S2530064422000542:mmc1.pdf]

**Supporting Information S1.** Original sources of data including the specialized and scientifically published meta-analyses, reviews and books (A) and online resources (B), and the numbers of studies included and excluded from these sources (C).

All processes of searching and finding the literature were conducted simultaneously and continuously during 2018-2021. The list (A) represents a sample of the most comprehensive literature on human-wildlife conflicts and co-existence, which was carefully explored to extract the information on the effectiveness of anti-predator interventions. The sources B1-B8 in (B) appeared very rarely during the keyword search; therefore, they were explored individually and completely.

## A.

1. Baker P.J., Boitani L., Harris S., Saunders G. and White P.C.L. 2008. Terrestrial carnivores and human food production: impact and management. *Mammal Review* 38, 123-166.
2. Baynham-Herd Z., Redpath S., Bunnefeld N., Molony T. and Keane A. 2018. Conservation conflicts: behavioural threats, frames, and intervention recommendations. *Biological Conservation* 222, 180-188.
3. Bruns A., Waltert M. and Khorozyan I. 2020. The effectiveness of livestock protection measures against wolves (*Canis lupus*) and implications for their co-existence with humans. *Global Ecology and Conservation* 21, e00868.
4. Eklund A., López-Bao J.V., Tourani M., Chapron G. and Frank, J. 2017. Limited evidence on the effectiveness of interventions to reduce livestock predation by large carnivores. *Scientific Reports* 7, 2097.
5. Frank B., Glikman J.A. and Marchini S. (eds.). 2019. Human-wildlife interactions. Turning conflict into coexistence. Cambridge, Cambridge University Press.
6. Graham K., Beckerman A.P. and Thirgood S. 2005. Human-predator-prey conflicts: ecological correlates, prey losses and patterns of management. *Biological Conservation* 122, 159-171.
7. Gray S.M., Booher C.R., Elliott K.C., Kramer D.B., Waller J.C., Millspaugh J.J., Kissui B.M. and Montgomery R.A. 2020. Research-implementation gap limits the actionability of human-carnivore conflict studies in East Africa. *Animal Conservation* 23, 7-17.
8. Guerisoli M.M., Luengos Vidal E., Caruso N., Giordano A.J. and Lucherini M. 2021. Puma-livestock conflicts in the Americas: a review of the evidence. *Mammal Review* 51, 228-246.
9. Hill C.M., Webber A.D. and Priston N.E.C. (eds.). 2020. Understanding conflicts about wildlife. A biosocial approach. NY, Berghahn.
10. Inskip C. and Zimmermann A. 2009. Human-felid conflict: a review of patterns and priorities worldwide. *Oryx* 43, 18-34.
11. Khorozyan I., Ghoddousi A., Soofi M. and Waltert M. 2015. Big cats kill more livestock when wild prey reaches a minimum threshold. *Biological Conservation* 192, 268-275.
12. Khorozyan I. and Waltert M. 2019a. A framework of most effective practices in protecting human assets from predators. *Human Dimensions of Wildlife* 24, 380-394.
13. Khorozyan I. and Waltert M. 2019b. How long do anti-predator interventions remain effective? Patterns, thresholds and uncertainty. *Royal Society Open Science* 6, 190826.

14. Khorozyan I. and Waltert M. 2020. Variation and conservation implications of the effectiveness of anti-bear interventions. *Scientific Reports* 10, 15341.
15. Khorozyan I. and Waltert M. 2021. A global view on evidence-based effectiveness of interventions used to protect livestock from wild cats. *Conservation Science and Practice* 3, e317.
16. Krafte Holland K., Larson L.R. and Powell, R.B. 2018. Characterizing conflict between humans and big cats *Panthera* spp: a systematic review of research trends and management opportunities. *PLoS One* 13, e0203877.
17. Linnell J.D.C., Aanes R., Swenson J.E., Odden J. and Smith M.E. 1997. Translocation of carnivores as a method for managing problem animals: a review. *Biodiversity and Conservation* 6, 1245-1257.
18. Littlewood N.A., Rocha R., Smith R.K., Martin P.A., Lockhart S.L., Schoonover R.F., Wilman E., Bladon A.J., Sainsbury K.A., Pimm S. and Sutherland W.J. 2020. Terrestrial mammal conservation: global evidence for the effects of interventions for terrestrial mammals excluding bats and primates. *Synopses of Conservation Evidence Series*. Cambridge, University of Cambridge.
19. Lozano J., Olszańska A., Morales-Reyes Z., Castro A.A., Malo A.F., Moleón M., Sánchez-Zapata J.A., Cortés-Avizanda A., von Wehrden H., Dorresteijn I., Kansky R., Fischer J. and Martín-López B. 2019. Human-carnivore relations: a systematic review. *Biological Conservation* 237, 480-492.
20. Miller J.R.B., Stoner K.J., Cejtin M.R., Meyer T.K., Middleton A.D. and Schmitz O.J. 2016. Effectiveness of contemporary techniques for reducing livestock depredations by large carnivores. *Wildlife Society Bulletin* 40, 806-815.
21. Moreira-Arce D., Ugarte C.S., Zorondo-Rodriguez F. and Simonetti J.A. 2018. Management tools to reduce carnivore-livestock conflicts: current gap and future challenges. *Rangeland Ecology and Management* 71, 389-394.
22. Rashid W., Shi J., Rahim I., Sultan H., Dong S. and Ahmad L. 2020. Research trends and management options in human-snow leopard conflict. *Biological Conservation* 242, 108413.
23. Redpath S.M., Gutierrez R.J., Wood K.A. and Young J.C. (eds.). 2015. *Conflicts in conservation. Navigating towards solutions*. Cambridge, Cambridge University Press.
24. Smith B.R., Yarnell R.W., Uzal A. and Whitehouse-Tedd K. 2020. The ecological effects of livestock guarding dogs (LGDs) on target and non-target wildlife. *Journal of Vertebrate Biology* 69, 20103.
25. Sutherland W.J., Brotherton P.N.M., Davies Z.G., Ockendon N., Pettorelli N. and Vickery J.A. 2020. *Conservation research, policy and practice*. Cambridge, Cambridge University Press.
26. Torres D.F., Oliveira E.S. and Alves R.R.N. 2018. Conflicts between humans and terrestrial vertebrates: a global review. *Tropical Conservation Science* 11, 1-15.
27. Treves A., Krofel M. and McManus J. 2016. Predator control should not be a shot in the dark. *Frontiers in Ecology and the Environment* 14, 380-388.
28. Treves A., Wallace R.B. and White S. 2009. Participatory planning of interventions to mitigate human-wildlife conflicts. *Conservation Biology* 23, 1577-1587.
29. Ugarte C.S., Moreira-Arce D. and Simonetti J.A. 2019. Ecological attributes of carnivore-livestock conflict. *Frontiers in Ecology and Evolution* 7, 433.
30. van Eeden L.M., Crowther M.S., Dickman C.R., Macdonald D.W., Ripple W.J., Ritchie E.G. and Newsome T.M. 2017. Managing conflict between large carnivores and livestock. *Conservation Biology* 32, 26-34.

31. van Eeden L.M., Eklund A., Miller J.R.B., López-Bao J.V., Chapron G., Cejtin M.R., Crowther M.S., Dickman C.R., Frank J., Krofel M., Macdonald D.W., McManus J., Meyer T.K., Middleton A.D., Newsome T.M., Ripple W.J., Ritchie E.G., Schmitz O.J., Stoner K.J., Tourani M. and Treves A. 2018. Carnivore conservation needs evidence-based livestock protection. *PLoS Biology* 16, e2005577.
32. VerCauteren K., Dolbeer R.A. and Gese E.M. 2012. Identification and management of wildlife damage. In: *The wildlife techniques manual*, 7<sup>th</sup> ed., vol. 2 (ed. Silvy N.J.), pp. 232-269. Baltimore, John Hopkins University Press.
33. Woodroffe R., Thirgood S. and Rabinowitz A. (eds.). 2005. *People and wildlife. Conflict or coexistence?* Cambridge, Cambridge University Press.

## B.

1. Carnivore Damage Prevention News (<http://www.lcie.org> and <http://www.medwolf.eu>). All issues published in 2000-2005 and 2014-2020 were read.
2. Cat News (<http://www.catsq.org>). All issues published in 1984-2020 were read.
3. Conservation Evidence (<http://www.conservationevidence.com>). All issues published in 2004-2020 were read.
4. Digital library of the IUCN/SSC Cat Specialist Group (<http://www.catsq.org>). The following search words were used to cover all 38 recent felid species for the full period of 1950-2020:

Acinonyx jubatus AND eff\* AND \*predat\*  
 Caracal aurata AND eff\* AND \*predat\*  
 Caracal caracal AND eff\* AND \*predat\*  
 Catopuma badia AND eff\* AND \*predat\*  
 Catopuma temmincki AND eff\* AND \*predat\*  
 Felis bieti AND eff\* AND \*predat\*  
 Felis chaus AND eff\* AND \*predat\*  
 Felis margarita AND eff\* AND \*predat\*  
 Felis nigripes AND eff\* AND \*predat\*  
 Felis silvestris AND eff\* AND \*predat\*  
 Herpailurus yagouaroundi AND eff\* AND \*predat\*  
 Leopardus colocolo AND eff\* AND \*predat\*  
 Leopardus geoffroyi AND eff\* AND \*predat\*  
 Leopardus guigna AND eff\* AND \*predat\*  
 Leopardus guttulus AND eff\* AND \*predat\*  
 Leopardus jacobita AND eff\* AND \*predat\*  
 Leopardus pardalis AND eff\* AND \*predat\*  
 Leopardus tigrinus AND eff\* AND \*predat\*  
 Leopardus wiedii AND eff\* AND \*predat\*

Leptailurus serval AND eff\* AND \*predat\*  
 Lynx canadensis AND eff\* AND \*predat\*  
 Lynx lynx AND eff\* AND \*predat\*  
 Lynx pardinus AND eff\* AND \*predat\*  
 Lynx rufus AND eff\* AND \*predat\*  
 Neofelis diardi AND eff\* AND \*predat\*  
 Neofelis nebulosa AND eff\* AND \*predat\*  
 Otocolobus manul AND eff\* AND \*predat\*  
 Panthera leo AND eff\* AND \*predat\*  
 Panthera onca AND eff\* AND \*predat\*  
 Panthera pardus AND eff\* AND \*predat\*  
 Panthera tigris AND eff\* AND \*predat\*  
 Panthera uncia AND eff\* AND \*predat\*  
 Pardofelis marmorata AND eff\* AND \*predat\*  
 Prionailurus bengalensis AND eff\* AND \*predat\*  
 Prionailurus planiceps AND eff\* AND \*predat\*  
 Prionailurus rubiginosus AND eff\* AND \*predat\*  
 Prionailurus viverrinus AND eff\* AND \*predat\*  
 Puma concolor AND eff\* AND \*predat\*

5. Digital library of IUCN/SSC Human-Wildlife Conflict Task Force (<http://www.hwctf.org>). All publications listed in sections on mammalian predators were read.
6. Proceedings of Vertebrate Pest Conference (<https://escholarship.org>). All issues published in 1962-2020 were read.
7. Proceedings of Wildlife Damage Management Conferences (<https://digitalcommons.unl.edu> and <https://wildlife.org>). All issues published in 2000-2013 (first link) and 2015-2017 (second link) were read.
8. Ursus (<https://www.bearbiology.org> and <https://www.bioone.org>). All issues published in 1968-2020 were read.

9. Web of Science (<https://apps.webofknowledge.com>). The following search words were used to cover the period 1970-2020:

|         |                                                                       |
|---------|-----------------------------------------------------------------------|
| General | Livestock AND effectiveness OR efficacy AND *predat*                  |
| Canids  | Wolf OR Canis lupus AND livestock AND protection OR *predat* AND eff* |
| Felids  | See B4 above                                                          |
| Ursids  | Helarctos malayanus AND eff*                                          |
|         | Melursus ursinus AND eff*                                             |
|         | Tremarctos ornatus AND eff*                                           |
|         | Ursus americanus AND eff*                                             |
|         | Ursus arctos AND eff*                                                 |
|         | Ursus maritimus AND eff*                                              |
|         | Ursus thibetanus AND eff*                                             |

The giant panda (*Ailuropoda melanoleuca*) was excluded because it is not known to cause conflicts with humans.

10. Google Scholar (<http://scholar.google.com>). See the search words and periods in B9 above.

### C.

| Source # as in parts (A) and (B) | No. publications on predators | No. publications used | % of publications used |
|----------------------------------|-------------------------------|-----------------------|------------------------|
| A1                               | 358                           | 27                    | 7.5                    |
| A2                               | 27                            | 1                     | 3.7                    |
| A3                               | 19                            | 19                    | 100.0                  |
| A4                               | 21                            | 20                    | 95.2                   |
| A5                               | 202                           | 12                    | 5.9                    |
| A6                               | 40                            | 6                     | 15.0                   |
| A7                               | 34                            | 6                     | 17.6                   |
| A8                               | 92                            | 5                     | 5.4                    |
| A9                               | 60                            | 2                     | 3.3                    |
| A10                              | 20                            | 6                     | 30.0                   |
| A11                              | 107                           | 9                     | 8.4                    |
| A12                              | 56                            | 56                    | 100.0                  |
| A13                              | 14                            | 14                    | 100.0                  |
| A14                              | 48                            | 48                    | 100.0                  |
| A15                              | 57                            | 57                    | 100.0                  |
| A16                              | 39                            | 8                     | 20.5                   |
| A17                              | 65                            | 13                    | 20.0                   |
| A18                              | 95                            | 81                    | 85.3                   |
| A19                              | 502                           | 54                    | 10.8                   |
| A20                              | 66                            | 45                    | 68.2                   |
| A21                              | 165                           | 31                    | 18.8                   |
| A22                              | 18                            | 4                     | 22.2                   |
| A23                              | 64                            | 4                     | 6.3                    |
| A24                              | 56                            | 15                    | 26.8                   |
| A25                              | 8                             | 0                     | 0.0                    |
| A26                              | 288                           | 36                    | 12.5                   |
| A27                              | 12                            | 9                     | 75.0                   |
| A28                              | 21                            | 3                     | 14.3                   |
| A29                              | 211                           | 32                    | 15.2                   |

|               |                  |                |                |
|---------------|------------------|----------------|----------------|
| A30           | 40               | 35             | 87.5           |
| A31           | 112              | 85             | 75.9           |
| A32           | 173              | 45             | 26.0           |
| A33           | 586              | 48             | 8.2            |
| B1            | 145              | 9              | 6.2            |
| B2            | 1781             | 7              | 0.4            |
| B3            | 7                | 3              | 42.9           |
| B4            | 341              | 26             | 7.6            |
| B5            | 93               | 32             | 34.4           |
| B6            | 107              | 23             | 21.5           |
| B7            | 28               | 2              | 7.1            |
| B8            | 950              | 15             | 1.6            |
| Mean $\pm$ SE | 173.9 $\pm$ 49.5 | 23.2 $\pm$ 3.4 | 34.3 $\pm$ 5.6 |
| Median        | 64.0             | 15.0           | 18.8           |
